# Supplementary material for: La distribución selectiva ante el Derecho comunitario de la libre competencia
Source: Oxford University Press journal article supplement (doi:10.1242/jeb.028266), 1994-01-01
Supplement: jeb028266tables1.pdf [file jeb028266tables1.pdf]

Table S1. Statistical analysis of the data displayed as Fig. 4. Correlations have been sought between the values for the changes in beat frequency ( $\Delta f$ ), arc wave velocity ( $\Delta \text{arcv}_w$ ) and swimming velocity ( $\Delta U_c$ ) and, in each case, the means of the individual values and the differences between the individual values

| Comparison                                                                          | Number of pairs | Correlation coefficient ( $R$ ) | $P$ value | Significance |
|-------------------------------------------------------------------------------------|-----------------|---------------------------------|-----------|--------------|
| $\Delta f$ relative to $(f_A + f_B)/2$                                              | 32              | 0.19                            | 0.30      | NS           |
| $\Delta f$ relative to $ f_A - f_B $                                                | 32              | -0.17                           | 0.36      | NS           |
| $\Delta \text{arcv}_w$ relative to $(\text{arcv}_{wA} + \text{arcv}_{wB})/2$        | 32              | -0.36                           | 0.04      | *            |
| $\Delta \text{arcv}_w$ relative to $ \text{arcv}_{wA} - \text{arcv}_{wB} $          | 32              | 0.50                            | 0.004     | **           |
| $\Delta U_c$ relative to $(U_{cA} + U_{cB})/2$                                      | 31              | -0.11                           | 0.54      | NS           |
| $\Delta U_c$ relative to $ U_{cA} - U_{cB} $                                        | 31              | -0.04                           | 0.84      | NS           |
| $\Delta \text{arcv}_w / \text{mean arcv}_w$ relative to $\Delta f / \text{mean } f$ | 32              | 0.49                            | 0.004     | **           |

Attention is drawn to the negative correlation between  $\Delta \text{arcv}_w$  and  $(\text{arcv}_{wA} + \text{arcv}_{wB})/2$ . This is suggestive of a metabolic limit to the rise in wave velocity. The positive correlation between the relative change in  $f$  and the relative change in  $\text{arcv}_w$  (bottom row) was perhaps to be expected. A and B refers to Sperm A and Sperm B, respectively. NS, not significant; \* $P < 0.05$ ; \*\* $P < 0.01$ .
